# Supplementary material
Source: publisher figshare collection journal article supplement (https://acs.figshare.com/ndownloader/files/15126359)
Supplement: Supplementary file 1 [file 15126359]

# Supporting Information

## Post-Translational Regulation of CYP450s Metabolism As Revealed by All-Atoms Simulations of the Aromatase Enzyme

Ida Ritacco<sup>1</sup>, Angelo Spinello<sup>1</sup>, Emiliano Ippoliti<sup>2</sup> and Alessandra Magistrato<sup>1</sup>

<sup>1</sup> CNR-IOM-Democritos c/o International School for Advanced Studies (SISSA), via Bonomea 265,  
34136 Trieste, Italy

<sup>2</sup> IAS-5/INM-9 Computational Biomedicine Institute and JARA-HPC, Forschungszentrum Jülich,  
Wilhelm-Johnen-Straße, 52425 Jülich, Germany

\*E-mail: [alessandra.magistrato@sissa.it](mailto:alessandra.magistrato@sissa.it)

**Figure S1.** Equilibrated structures of the adduct between HA and FMN domain, obtained from docking programs before and after the refinement by FiberDock server.

**Figure S2.** RMSD (nm) vs simulation time (ns) for the FMN/HA models resulting from MD simulations.

**Figure S3.** RMSD (nm) vs simulation time (ns) of Human Aromatase (HA) and phosphorylated HA (PhHA).

**Figure S4.** RMSF (nm) vs residues number of HA and PhHA.

**Figure S5.** Hydrogen bond network of HA and PhHA.

**Figure S6.** Structure of the adduct between wt and PhHA with FMN domain.

**Figure S7.** RMSD (nm) vs simulation time (ns) for FMN/HA and FMN/PhHA.

**Figure S8.** RMSF (nm) vs residues number for FMN/HA and FMN/PhHA.

**Figure S9.** Frontier Orbitals along with their relative energies (eV) of FMN in CPR/HA (A) and CPR/PhHA (B).

**Figure S10.** Phosphorylated residues across the CYP450s superfamily.

**Table S1.** Non-bonded interaction energies (kcal/mol) of FMN/HA resulting from MD simulations.

**Table S2.** Bond distances between FMN and HEM cofactors in FMN models.

**Table S3.** Intereacting residues at the HA-CPR interface resulting from MD simulations.

**Table S4.** Residues involved in the interaction between wt HA, PhHA and FMN domain.

**Table S5.** Residues involved in the interaction between wt HA, PhHA and membrane components.

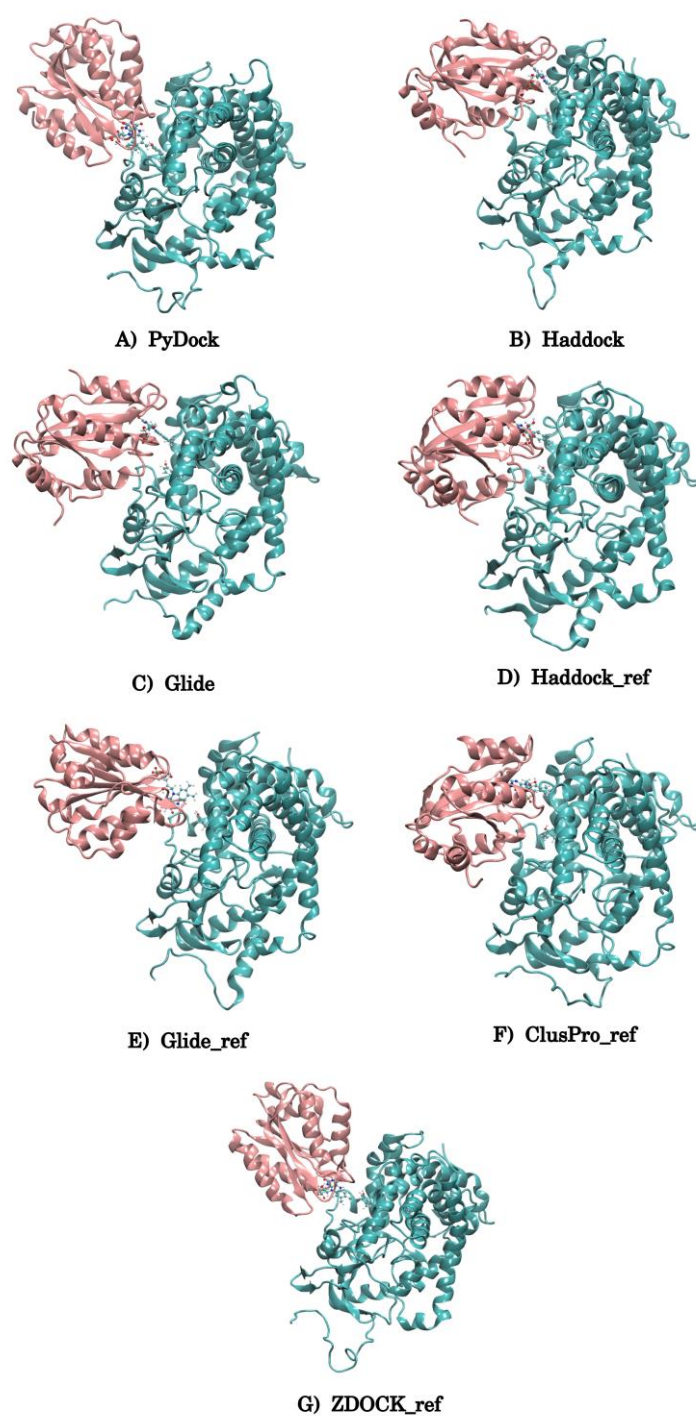

**Figure S1.** Equilibrated structures of FMN/HA obtained from ClusPro,<sup>1</sup> Glide,<sup>2</sup> Haddock,<sup>3</sup> PyDock<sup>4</sup> and ZDOCK<sup>5</sup> docking programs before and after the refinement by FiberDock server (indicated as \_ref subscript).<sup>6</sup> HA is shown as a cyan ribbon, the FMN domain is represented as a pink ribbon, while FMN and Y361 cofactors are shown in ball and stick.

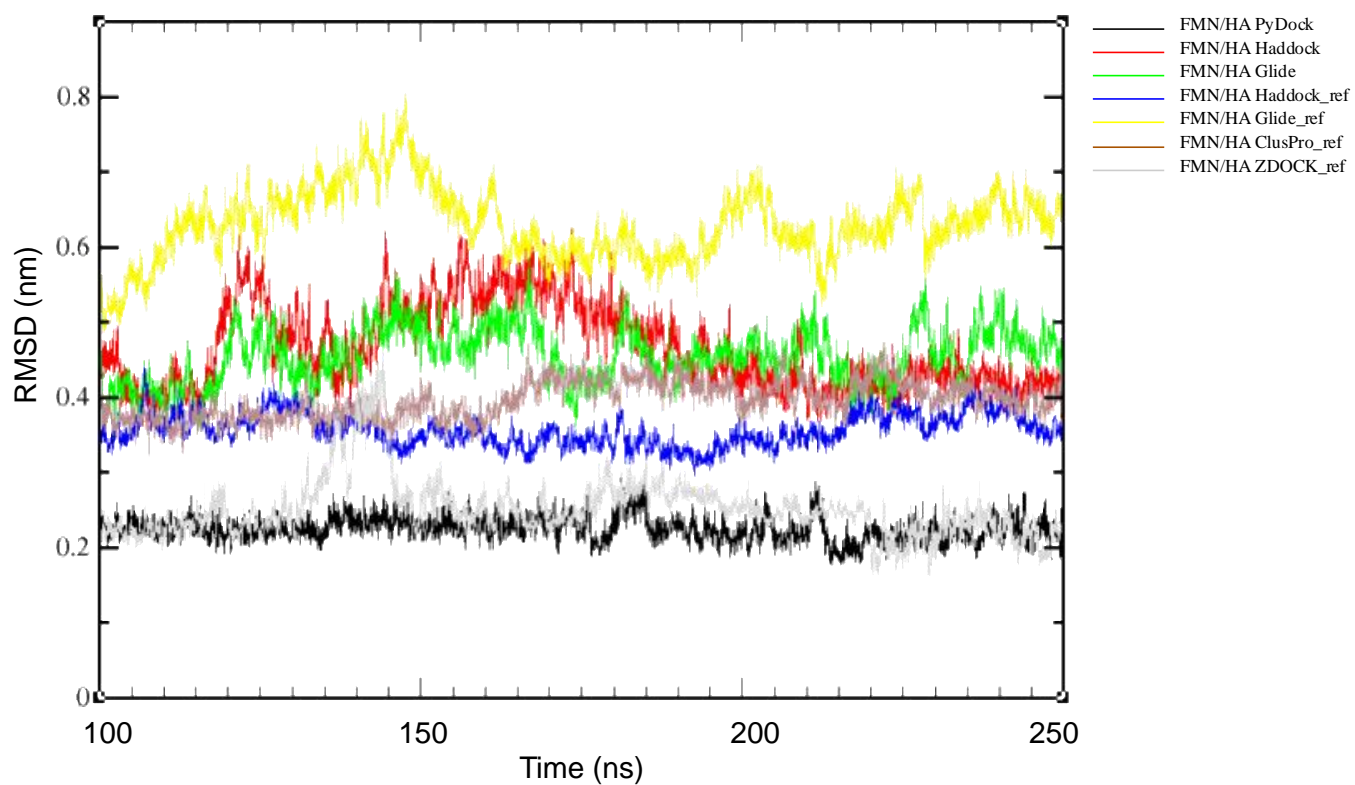

**Figure S2.** RMSD (nm) calculated on  $C\alpha$  atoms vs simulation time (ns) of FMN/HA models represented by black, red, green, blue, yellow, brown and gray lines, respectively. The reference structure for the RMSD calculation is the initial frame of the MD simulation.

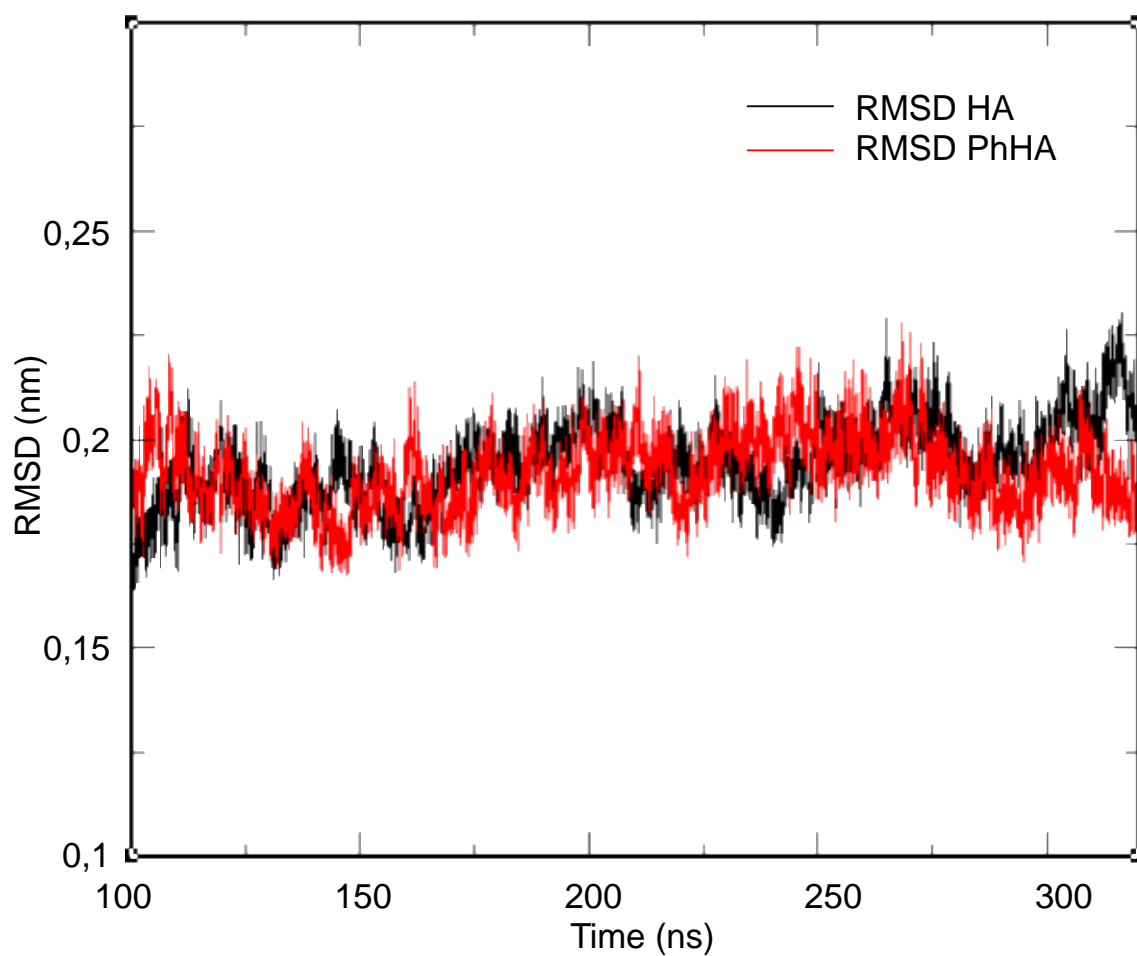

**Figure S3.** RMSD (nm) calculated on C $\alpha$  atoms vs simulation time (ns) of HA and PhHA represented by black and red lines, respectively. The reference structure for the RMSD calculation is the initial frame of the MD simulation.

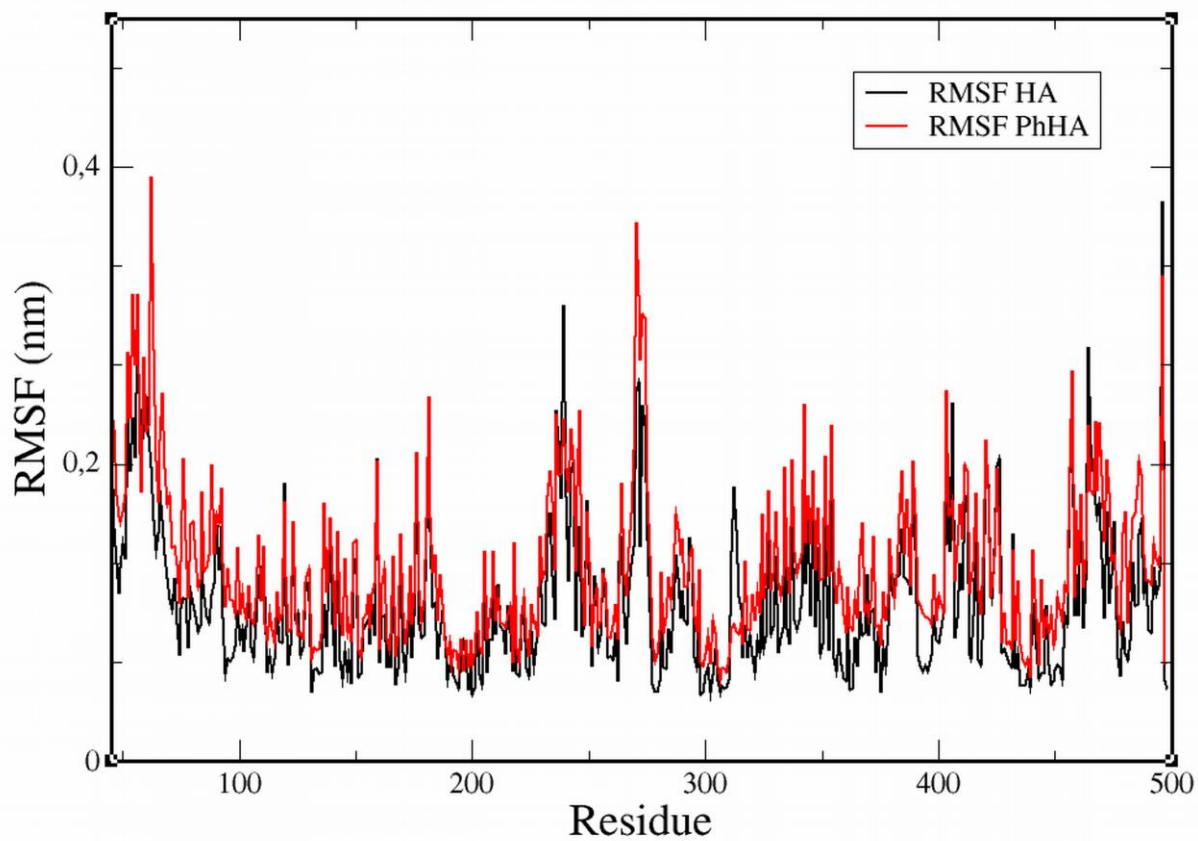

**Figure S4.** RMSF (nm) for HA and PhHA represented in black and red, respectively. Residues belonging to the transmembrane helix (1-44) are omitted for clarity.

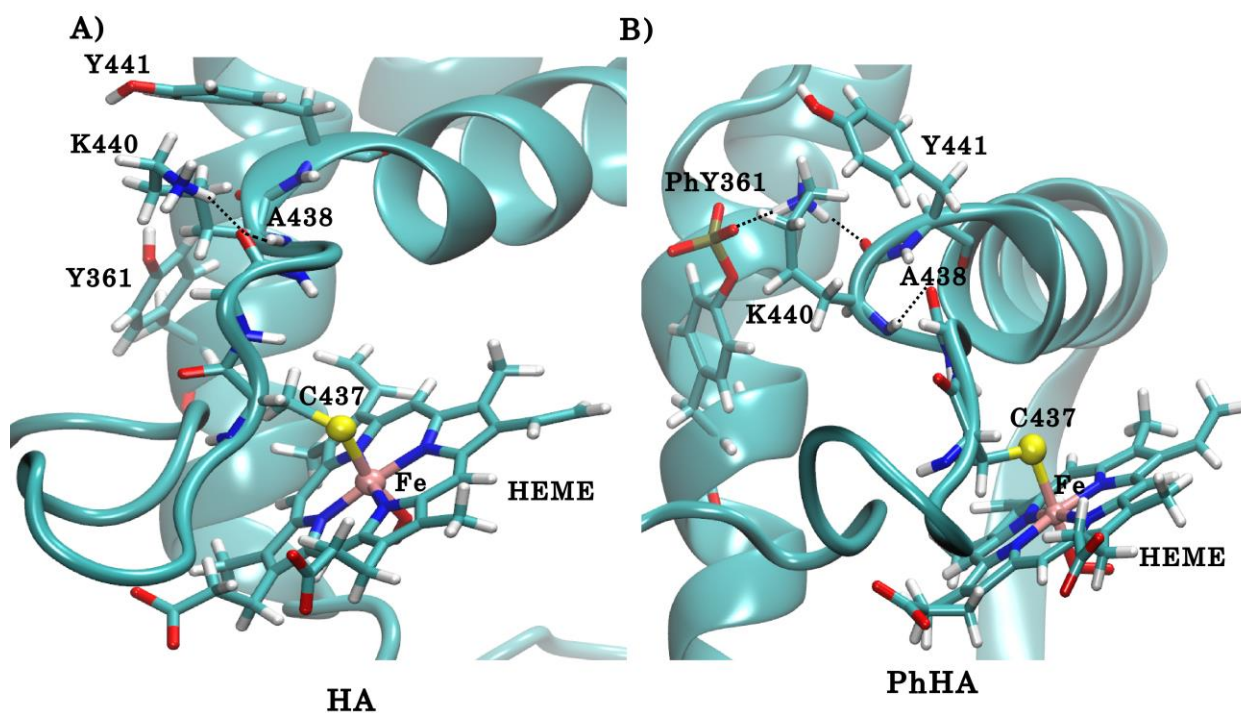

**Figure S5.** (A) Hydrogen (H)-bond network lining the heme proximal cavity in HA. H-bonds  $K440@Nz..OC@A438=1.8 \pm 0.2 \text{ \AA}$  (persistence 83%) and  $K440@Nz..OP@PhY361=1.8 \pm 0.3 \text{ \AA}$  (persistence 88%) in HA (A) and PhHA (B), respectively.



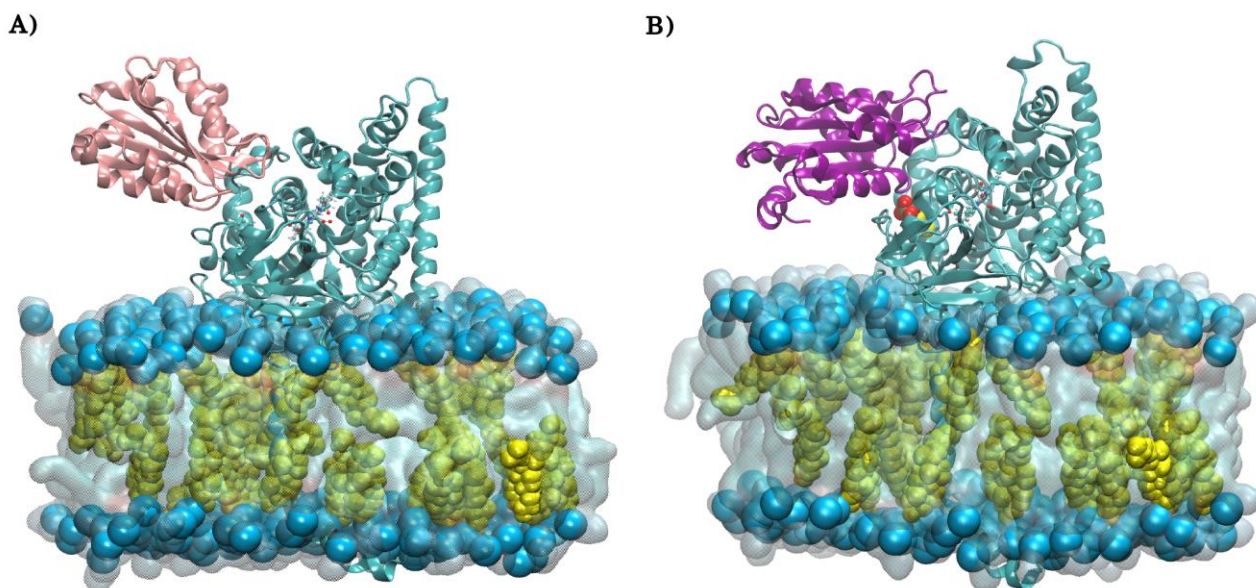

**Figure S6.** Equilibrated structure of (A) FMN/HA and (B) FMN/PhHA adducts as extracted from the cluster analysis of classical MD trajectory embedded in a mixed 1-palmitoyl-2-oleoyl-sn-glycero-3-phosphocholine (POPC)/cholesterol (CHL) membrane. Phosphorylated Y361 is shown as yellow and red van der Waals (vdw) spheres, HA is shown as a cyan ribbon, POPC molecules are shown as transparent surface with the phosphorus atoms highlighted as light blue vdw spheres, CHL molecules are shown as yellow vdw spheres. A different orientation of the FMN domain represented in pink in FMN/HA and purple in FMN/PhHA, respectively.

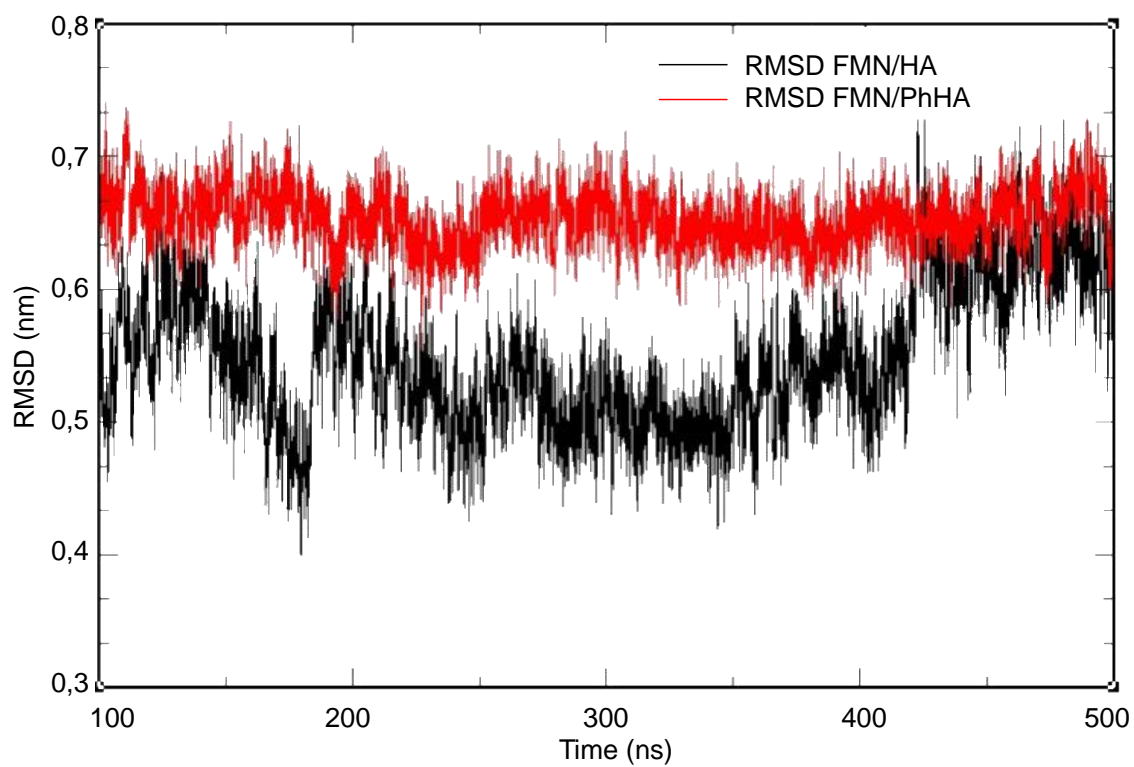

**Figure S7.** RMSD (nm) calculated on C $\alpha$  atoms vs simulation time (ns) of FMN/HA and FMN/PhHA represented by black and red lines, respectively. The reference structure for the RMSD calculation is the initial frame of the MD simulation.



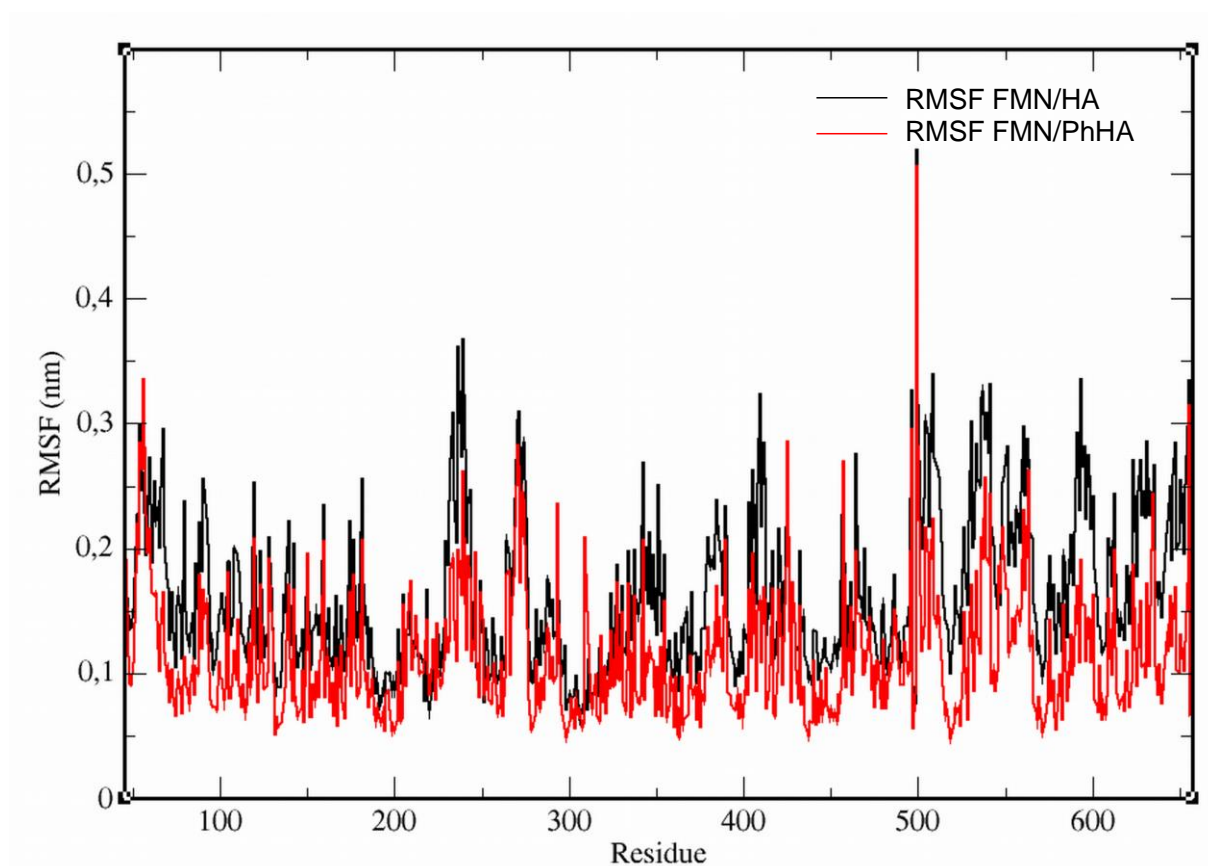

**Figure S8.** RMSF (nm) of FMN/HA and FMN/PhHA adducts represented in black and red, respectively.

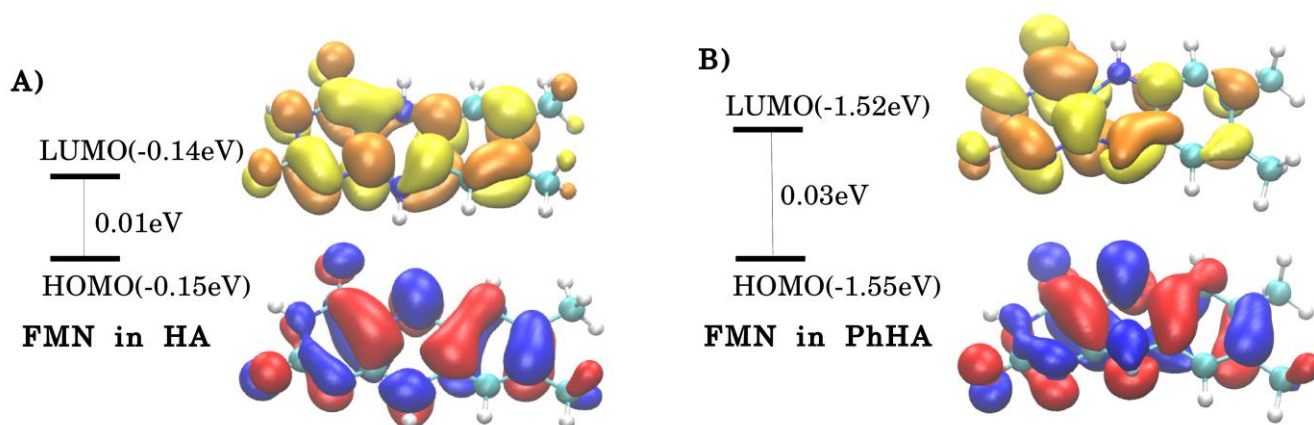

**Figure S9.** Graphical and energetic representation of the HOMO and LUMO orbitals of FMN in FMN/HA (A) and FMN in FMN/PhHA (B), along with their relative energies (eV).

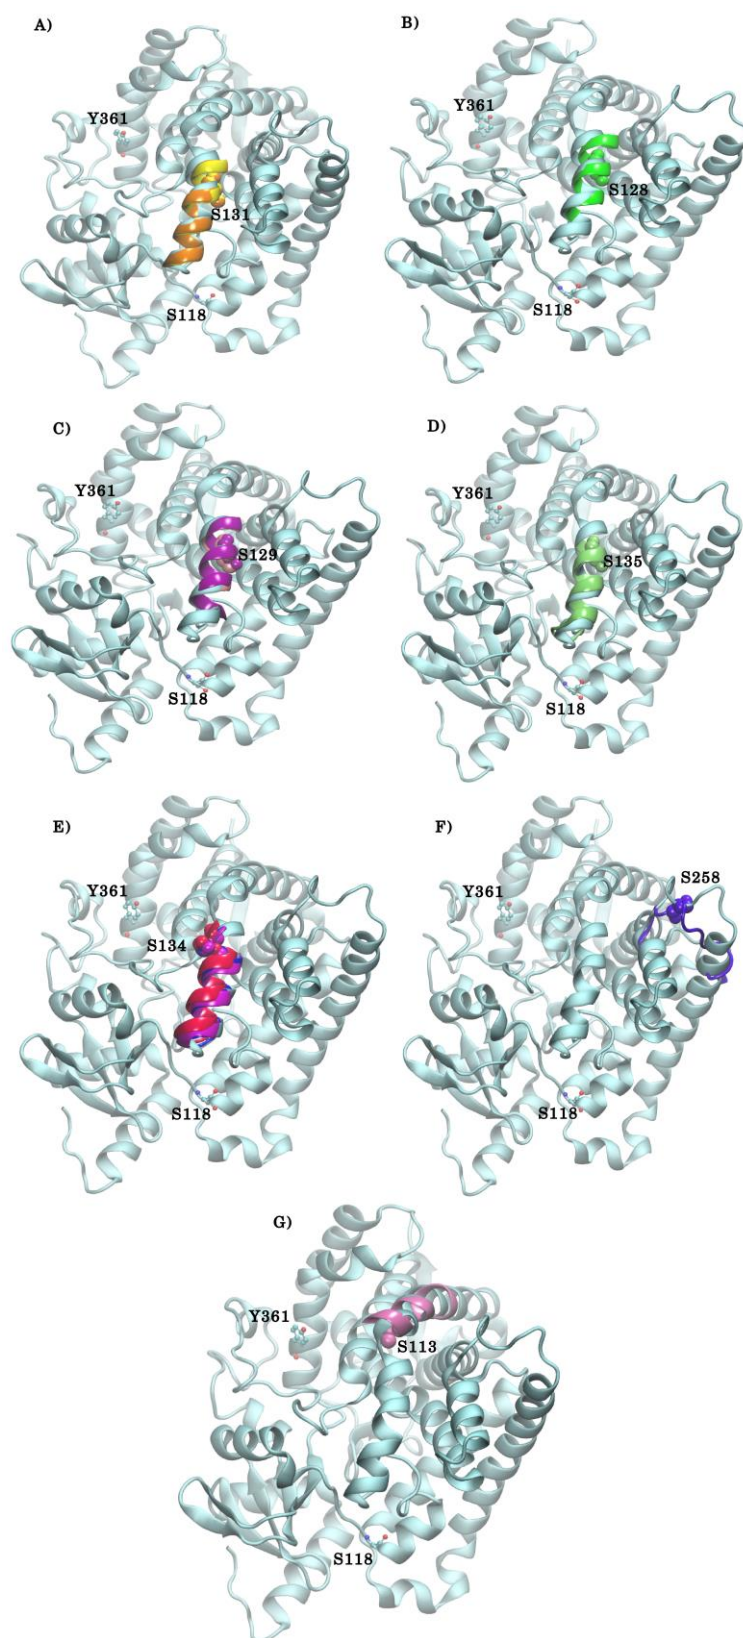

**Figure S10.** Phosphorylation sites describing the positions reported in Table 2 of the main text determining an enhanced catalysis of CYP450s. Orange, yellow, green, pink, purple, lime, dark blue, magenta, red, violet, and light pink show an alignment of the helix phosphorylated in A) CYP2A6, CYP2A13, B) CYP2B6, C) CYP2C8, CYP2E1, D) CYP2D6, E) CYP3A4, CYP3A5, CYP3A7, F) CYP17A1, G) CYP11A1, respectively, and on the corresponding helix of HA.

**Table S1.** Van der Waals and electrostatic non-bonded interaction energies (kcal/mol) of FMN/HA after the MD simulations of the structures obtained by the different docking programs listed. Standard deviations are reported.

| Energy of FMN/HA | Pydock      | Haddock     | Glide       | Haddock_ref | Glide_ref  | ClusPro_ref | ZDOCK_ref   |
|------------------|-------------|-------------|-------------|-------------|------------|-------------|-------------|
| Van der Waals    | -115.2±27.5 | -109.9±23.4 | -86.22±15.6 | -110.2±23.3 | -59.6±13.6 | -110.6±27.8 | -103.9±21.1 |
| Electrostatic    | -41.6±4.1   | -51.5±6.4   | -30.1±4.4   | -51.4±6.2   | -21.8±3.8  | -50.7±6.2   | -49.7±5.8   |

**Table S2.** Bond distances between FMN cofactor and the iron of the heme moiety (Å) in FMN/HA as measured along the MD simulations of the models obtained by the different docking programs listed.

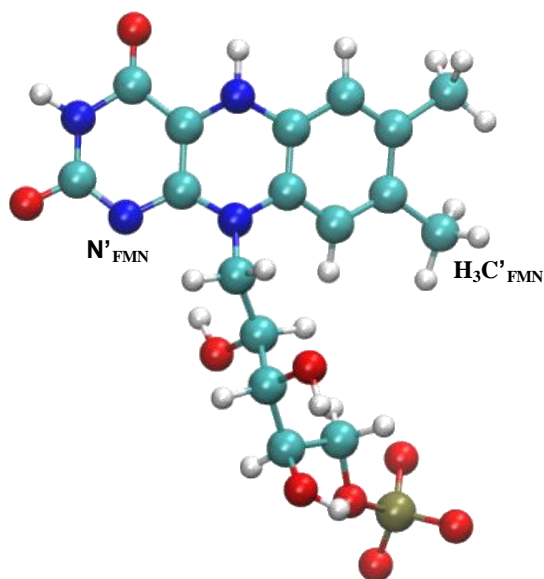

**FMN COFACTOR**

| Distance (d)                                                            | Pydock         | Haddock        | Glide          | Haddock_ref    | Glide_ref      | ClusPro_ref    | ZDOCK_ref      |
|-------------------------------------------------------------------------|----------------|----------------|----------------|----------------|----------------|----------------|----------------|
| $d(N'_{\text{FMN}}\text{-Fe}_{\text{HEM}})^{\text{a}}$                  | $18.1 \pm 0.2$ | $21.1 \pm 0.7$ | $20.3 \pm 0.6$ | $21.3 \pm 0.6$ | $20.4 \pm 0.6$ | $22.7 \pm 0.4$ | $19.8 \pm 0.6$ |
| $d(\text{H}_3\text{C}'_{\text{FMN}}\text{-Fe}_{\text{HEM}})^{\text{a}}$ | $12.4 \pm 0.4$ | $16.4 \pm 1.3$ | $15.2 \pm 0.8$ | $15.8 \pm 1.0$ | $20.3 \pm 1.2$ | $17.8 \pm 0.9$ | $14.6 \pm 0.7$ |

<sup>a</sup>We considered either distances between the  $N'_{\text{FMN}}$  and Fe and that between  $\text{H}_3\text{C}'_{\text{FMN}}$  and Fe of the heme since the FMN cofactor is aromatic and as a result the electron, which has to be donated to the heme, is delocalized.<sup>7</sup>

**Table S3.** Residues involved into persistent H-bonds observed in FMN/HA after the MD simulations of the structures obtained by the different docking programs listed.

| <b>FMN/HA</b>      | <b>FMN domain</b> | <b>HA</b> |
|--------------------|-------------------|-----------|
| <b>PYDOCK</b>      | Asp211            | Lys108    |
|                    | Glu145            | Tyr441    |
|                    | FMN226            | Tyr441    |
|                    | Asp150            | Lys354    |
|                    | Gln153            | Lys354    |
|                    | Glu95             | Lys420    |
| <b>HADDOCK</b>     | Asp154            | Lys108    |
|                    | Asp150            | Tyr441    |
|                    | FMN226            | Gln351    |
| <b>GLIDE</b>       | Asp157            | Lys108    |
|                    | Asp157            | Arg425    |
|                    | Asp147            | Tyr424    |
| <b>HADDOCK_ref</b> | Asp157            | Lys108    |
|                    | Glu118            | Asn110    |
|                    | Asp150            | Arg145    |
|                    | Glu182            | Lys354    |
| <b>GLIDE_ref</b>   | Glu182            | Tyr441    |
| <b>CLUSPRO_ref</b> | Asp157            | Lys108    |
|                    | Glu145            | Gln351    |
|                    | Glu95             | Lys150    |
| <b>ZDOCK_ref</b>   | Asp211            | Lys108    |
|                    | Gln90             | Tyr424    |
|                    | Glu145            | Tyr441    |
|                    | Asp150            | Asn421    |
|                    | Gln90             | Asn421    |

**Table S4.** Residues involved into persistent hydrogen bonds observed during MD simulations of the FMN/HA and FMN/PhHA adducts. The interactions established between PhHA and FMN domain, following after phosphate addition on the equilibrated HA/CPR model and FMN repositioning during the MD simulations have been highlighted in sky blue. Atom labels have been assigned according to the Amber force field labelling scheme.

| FMN domain         | HA                 | Persistence (%) | Average distance (Å) |
|--------------------|--------------------|-----------------|----------------------|
| Asp150@OD1         | Lys354@HZ2         | 98.2            | 2.7                  |
| Asp157@OD2         | Lys352@HZ1         | 83.6            | 2.8                  |
| Glu95@OE1          | Lys420@HZ1         | 77.8            | 2.7                  |
| Glu96@OE2          | Lys420@HZ2         | 73.1            | 2.7                  |
| Asp211@O           | <b>Lys108@HZ1</b>  | 65.1            | 2.8                  |
| <b>FMN226@H1</b>   | <b>Tyr441@OH</b>   | 59.6            | 2.8                  |
| Glu45@OE1          | Tyr441@HH          | 54.8            | 2.7                  |
| Gln153@OE1         | Lys354@HZ1         | 53.9            | 2.8                  |
| Asn151@HD21        | Asn421@OD1         | 45.5            | 2.8                  |
| Gln153@OE1         | Lys354@HZ2         | 32.3            | 2.8                  |
| Asp150@OD2         | Lys354@HZ1         | 31.7            | 2.8                  |
| FMN domain         | PhHA               | Persistence (%) | Average distance (Å) |
| Asp150@OD2         | Lys354@HZ2         | 100             | 2.8                  |
| <b>Asp116@OD1</b>  | <b>Lys420@HZ1</b>  | 99.2            | 2.8                  |
| Glu96@OE1          | <b>Lys108@HZ2</b>  | 98.0            | 2.8                  |
| <b>Glu118@OE1</b>  | <b>Lys420@HZ2</b>  | 97.3            | 2.8                  |
| Asn151@OD1         | Lys354@HZ3         | 96.0            | 2.8                  |
| <b>Tyr143@HH</b>   | <b>Ile347@O</b>    | 95.9            | 2.7                  |
| Glu95@OE2          | <b>Arg425@HH22</b> | 94.4            | 2.8                  |
| <b>Tyr87@HH</b>    | <b>Asn421@OD1</b>  | 88.3            | 2.8                  |
| Glu95@OE1          | <b>Arg425@HH12</b> | 85.3            | 2.8                  |
| <b>Glu119@OE1</b>  | <b>Lys420@HZ3</b>  | 75.3            | 2.8                  |
| Glu95@OE2          | <b>Arg425@HH12</b> | 44.9            | 2.9                  |
| <b>Thr180@OG1</b>  | <b>Lys150@HZ2</b>  | 44.6            | 2.9                  |
| <b>Asn178@HD21</b> | <b>Ser153@OG</b>   | 24.0            | 2.9                  |
| <b>Thr180@OG1</b>  | <b>Lys150@HZ1</b>  | 21.2            | 2.9                  |
| Asn151@HD21        | Asn421@OD1         | 18.3            | 2.9                  |



**Table S5.** Residues involved into persistent hydrogen bonds observed during MD simulations between membrane components and HA/PhHA systems.

| <b>Membrane lipid</b> | <b>HA</b>   | <b>Persistence (%)</b> | <b>Average distance (Å)</b> |
|-----------------------|-------------|------------------------|-----------------------------|
| PC17@O34              | Ser46@HG    | 100.0                  | 2.6                         |
| PC23@O34              | Ser61@HG    | 99.5                   | 2.6                         |
| PC26@O22              | Tyr41@HH    | 98.7                   | 2.7                         |
| PC44@O33              | Arg79@HE    | 95.7                   | 2.7                         |
| CHL10@O1              | Tyr76@HH    | 95.2                   | 2.8                         |
| PC11@O34              | Trp67@HE1   | 90.7                   | 2.8                         |
| PC143@O33             | Lys243@HZ3  | 89.6                   | 2.8                         |
| CHL1@O1               | Asn40@HD22  | 86.7                   | 2.9                         |
| PC2@O22               | His62@H     | 84.3                   | 2.8                         |
| PC23@O12              | Gly57@H     | 82.6                   | 2.8                         |
| PC95@O33              | His62@H     | 75.2                   | 2.8                         |
| PC17@O34              | Gly49@H     | 44.5                   | 2.9                         |
| PC23@O12              | Ile56@H     | 38.6                   | 2.9                         |
| <b>Membrane lipid</b> | <b>PhHA</b> | <b>Persistence (%)</b> | <b>Average distance (Å)</b> |
| PC23@O34              | Ser61@HG    | 100.0                  | 2.6                         |
| PC26@O34              | Ser46@HG    | 99.8                   | 2.5                         |
| PC11@O34              | Arg64@HH12  | 99.3                   | 2.7                         |
| PC2@O22               | His62@H     | 91.7                   | 2.8                         |
| PC20@O34              | Asn40@HD22  | 91.7                   | 2.8                         |
| CHL10@O1              | Tyr76@HH    | 90.2                   | 2.8                         |
| PC95@O33              | His62@HE2   | 86.2                   | 2.8                         |
| PC44@O33              | Arg79@HH21  | 86.1                   | 2.7                         |
| PC23@O12              | Gly57@H     | 82.3                   | 2.8                         |
| PC134@O34             | Lys243@HZ3  | 80.8                   | 2.8                         |
| PC11@O34              | Trp67@HE1   | 80.1                   | 2.8                         |
| PC143@O33             | Lys243@HZ1  | 80.0                   | 2.8                         |
| PC11@O34              | Arg64@HH22  | 59.5                   | 2.8                         |
| PC44@O33              | Arg79@HE    | 58.2                   | 2.8                         |
| CHL14@O1              | Arg64@HH11  | 35.9                   | 2.9                         |
| PC143@O34             | Lys243@HZ1  | 35.1                   | 2.8                         |
| PC23@O12              | Ile56@H     | 29.1                   | 2.9                         |
| PC134@O33             | Lys243@HZ3  | 26.9                   | 2.8                         |
| PC44@O34              | Arg79@HH21  | 23.8                   | 2.8                         |

## References:

- (1) Kozakov, D.; Hall, D. R.; Xia, B.; Porter, K. A.; Padhorny, D.; Yueh, C.; Beglov, D.; Vajda, S. The ClusPro web server for protein-protein docking. *Nat. Protoc.* **2017**, *12*, 255.
- (2) Friesner, R. A.; Banks, J. L.; Murphy, R. B.; Halgren, T. A.; Klicic, J. J.; Mainz, D. T.; Repasky, M. P.; Knoll, E. H.; Shelley, M.; Perry, J. K. et al. Glide: a new approach for rapid, accurate docking and scoring. 1. Method and assessment of docking accuracy. *J. Med. Chem.* **2004**, *47*, 1739.
- (3) van Zundert, G. C. P.; Rodrigues, J.; Trellet, M.; Schmitz, C.; Kastiris, P. L.; Karaca, E.; Melquiond, A. S. J.; van Dijk, M.; de Vries, S. J.; Bonvin, A. The HADDOCK2.2 Web Server: User-Friendly Integrative Modeling of Biomolecular Complexes. *J. Mol. Biol.* **2016**, *428*, 720.
- (4) Jimenez-Garcia, B.; Pons, C.; Fernandez-Recio, J. pyDockWEB: a web server for rigid-body protein-protein docking using electrostatics and desolvation scoring. *Bioinformatics* **2013**, *29*, 1698.
- (5) Pierce, B. G.; Wiehe, K.; Hwang, H.; Kim, B. H.; Vreven, T.; Weng, Z. ZDOCK server: interactive docking prediction of protein-protein complexes and symmetric multimers. *Bioinformatics* **2014**, *30*, 1771.
- (6) Mashiach, E.; Nussinov, R.; Wolfson, H. J. FiberDock: Flexible induced-fit backbone refinement in molecular docking. *Proteins* **2010**, *78*, 1503.
- (7) Dubey, K. D.; Shaik, S. Choreography of the Reductase and P450BM3 Domains Toward Electron Transfer Is Instigated by the Substrate. *J. Am. Chem. Soc.* **2018**, *140*, 683.
